# Supplementary material for: 3D hierarchical MnO2 microspheres: a prospective material for high performance supercapacitors and lithium-ion batteries
Source: Royal Society of Chemistry journal article supplement (doi:10.1039/c7se00317j), 2017-01-01
Supplement: c7se00317j1.pdf [file c7se00317j1.pdf]

## Electronic Supplementary Information

### **3D hierarchical MnO<sub>2</sub> microspheres: a prospective material for high performance supercapacitor and lithium-ion batteries**

*Syed Khalid, Chuanbao Cao<sup>\*</sup>, Muhammad Naveed and Waqar Younas*

Research Center of Materials Science, Beijing Key Laboratory of Construction Tailorable  
Advanced Functional Materials and Green Applications, Beijing Institute of Technology,  
Beijing 100081, P. R. China.

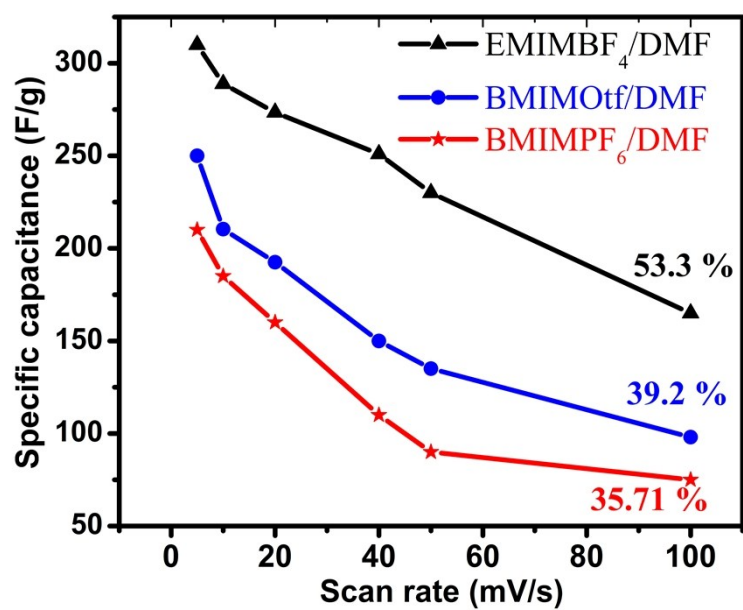

Figure S1. specific capacitance of 3DH-MnO<sub>2</sub> as a function of scan rates using various ionic electrolytes.

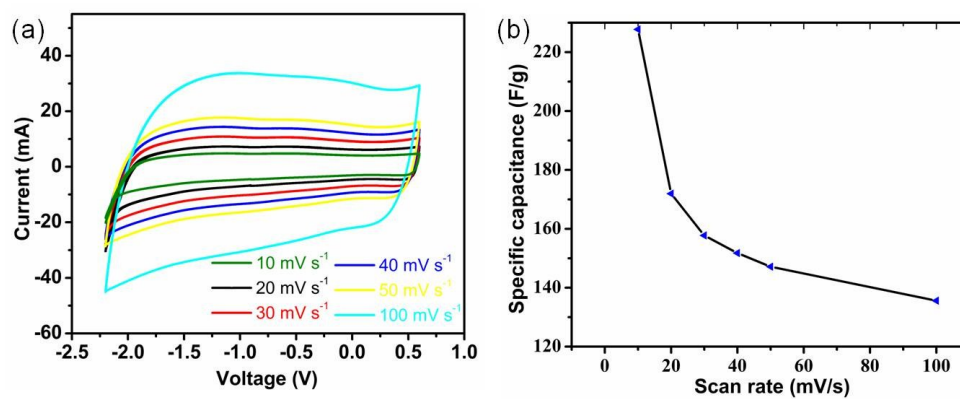

Figure S2. (a) CV curves and (b) specific capacitance of active carbon (A.C) at various scan rates

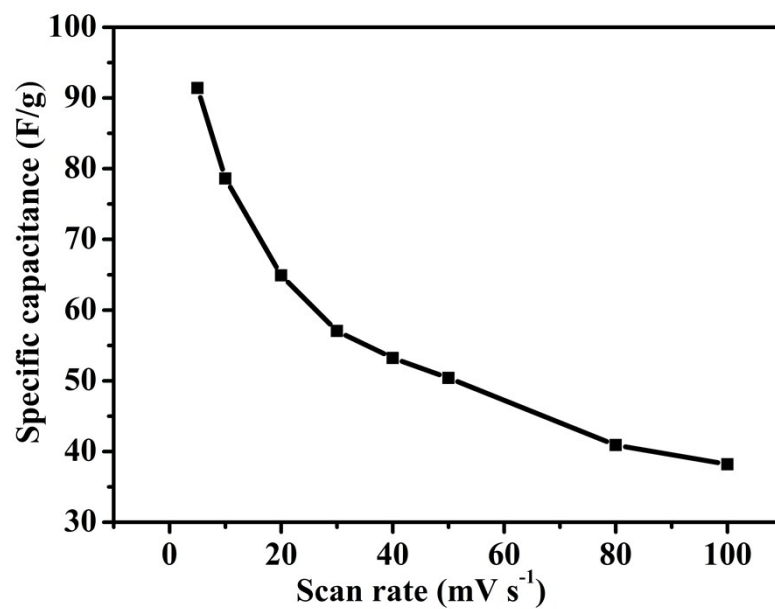

Figure S3. specific capacitance of asymmetric device at various scan rates

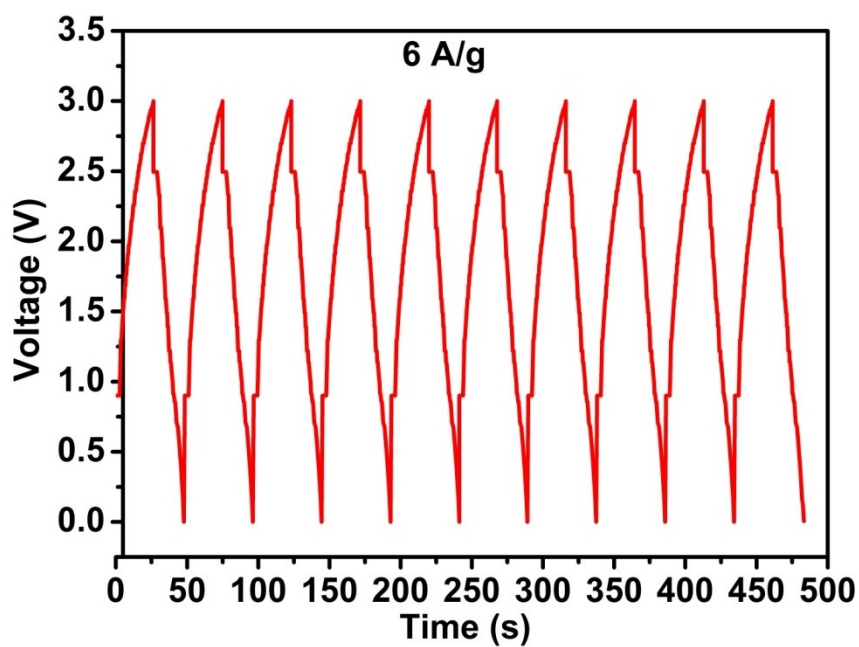

Figure S4. CP curves of asymmetric device at 6 A g<sup>-1</sup>

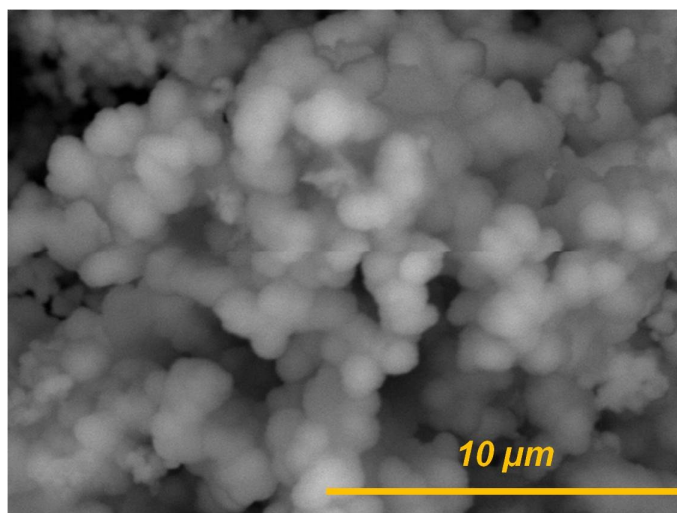

Figure S5. SEM image of supercapacitor cathode material after cyclic test

Table S1. Comparison of the performance metrics energy density (E.D) and power density (P.D) at various current density (C.D) of as-fabricated ( $\text{MnO}_2//\text{AC}$ ) asymmetric device with previously reported devices.

| System                                        | E.D<br>(Wh/kg) | P.D<br>(W/Kg) | C.D<br>(A/g) | Ref.      |
|-----------------------------------------------|----------------|---------------|--------------|-----------|
| 3DH- $\text{MnO}_2//\text{AC}$                | 105            | 1494          | 1            | This work |
| NF-CNT-AU- $\text{MnO}_2//\text{A.C}$         | 67.5           | 593.8         | 0.4          | 1         |
| $\text{MnO}_2 //\text{A.C}$                   | 95             | 1200          | 0.2          | 2         |
| HPNC //HPNC                                   | 102            | 1005          | 0.1          | 3         |
| $\text{MnO}_2\text{-Pd-CNTs-NF} //\text{A.C}$ | 78.4           | 1100          | 0.5          | 4         |
| PNG//PNG                                      | 163.8          | 600           | 0.5          | 5         |
| Graphene//Graphene                            | 90             | 558           | 0.5          | 6         |
| $\text{Nb}_2\text{O}_5//\text{A.C}$           | 86             | 650           | 1            | 7         |

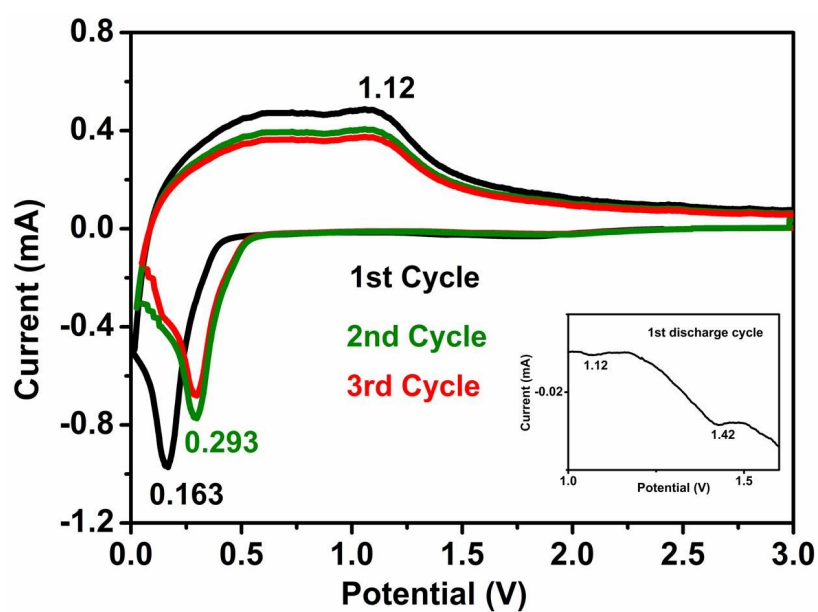

Figure S6. CV curves of the first three cycles at a scan rate of 0.1 mV/s (inset : the enlarged view of CV curve of 1st discharge cycle from 1.0 to 1.6 V)

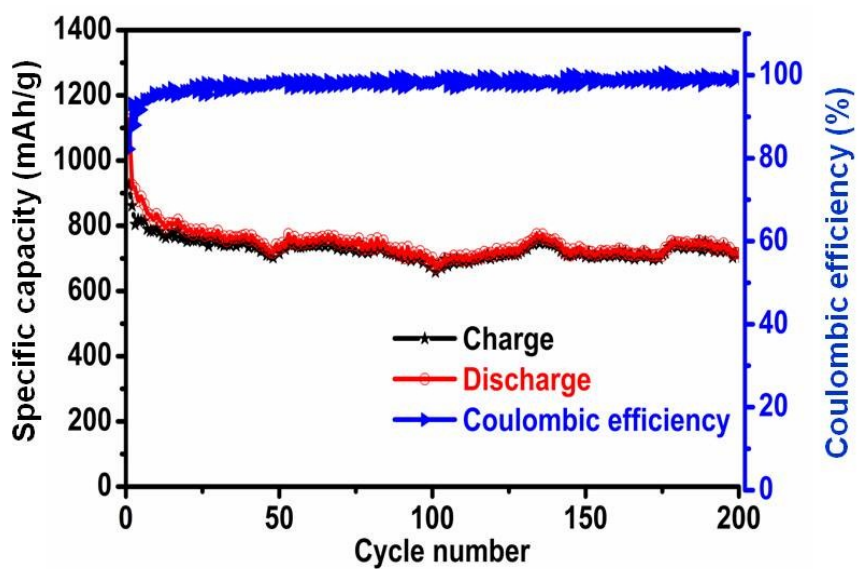

Figure S7. Charge - discharge capacity and coulombic efficiency as a function of cycle numbers at 300 mA/g (plotted from the 1st cycle)

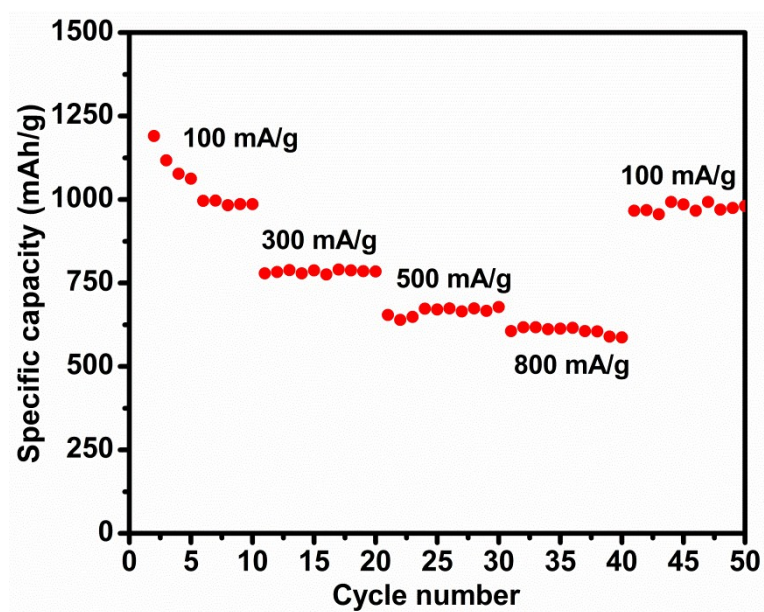

Figure S8. Rate capability of the electrode (plotted from the 2nd cycle)

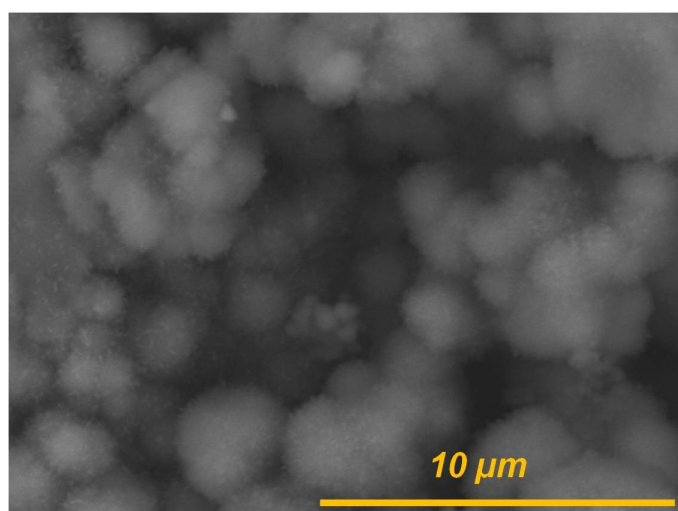

Figure S9. SEM image of Li-ion battery anode material after cyclic test

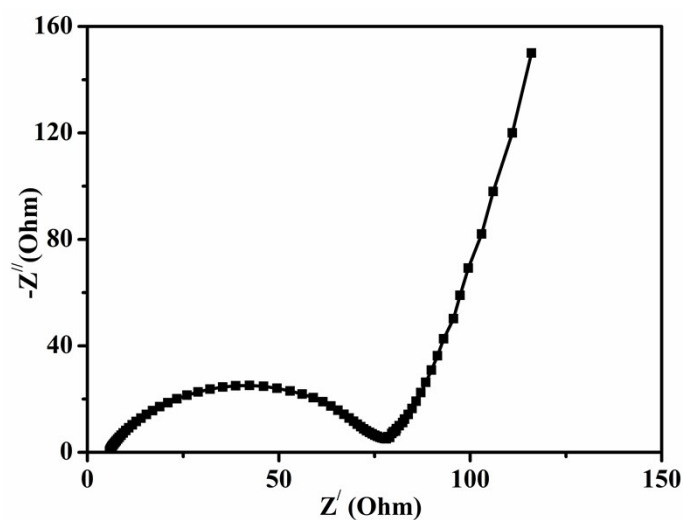

Figure S10. Nyquist plot of the Li/MnO<sub>2</sub> cell before discharge and charge at open circuit voltage.

1. X. Zhang, D. Zhao, Y. Zhao, P. Tang, Y. Shen, C. Xu, H. Li and Y. Xiao, *J. Mater. Chem. A*, 2013, **1**, 3706-3712.
2. S. Maiti, A. Pramanik and S. Mahanty, *RSC Adv.*, 2015, **5**, 41617-41626.
3. J. Hou, C. Cao, F. Idrees and X. Ma, *ACS Nano*, 2015, **9**, 2556-2564.
4. D. Zhao, Y. Zhao, X. Zhang, C. Xu, Y. Peng, H. Li and Z. Yang, *Mater. Lett.*, 2013, **107**, 115-118.
5. D. Liu, C. Fu, N. Zhang, Y. Li, H. Zhou and Y. Kuang, *J. Solid State Electrochem.*, 2017, **21**, 759-766.
6. C. Liu, Z. Yu, D. Neff, A. Zhamu and B. Z. Jang, *Nano Lett.*, 2010, **10**, 4863-4868.
7. F. Idrees, J. Hou, C. Cao, F. K. Butt, I. Shakir, M. Tahir and F. Idrees, *Electrochim. Acta*, 2016, **216**, 332-338.
